# Supplementary material for: Ovarian carcinoma immunoreactive antigen domain 2 controls mitochondrial apoptosis in lung adenocarcinoma
Source: PubMed Central journal article supplement — Cancer Sci. 2021 Oct 18;112(12):5114–26. doi: 10.1111/cas.15160 (PMC8645747; doi:10.1111/cas.15160), 2021-10-18

**A**

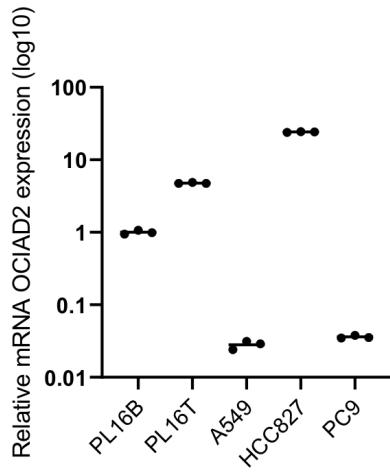

**B**

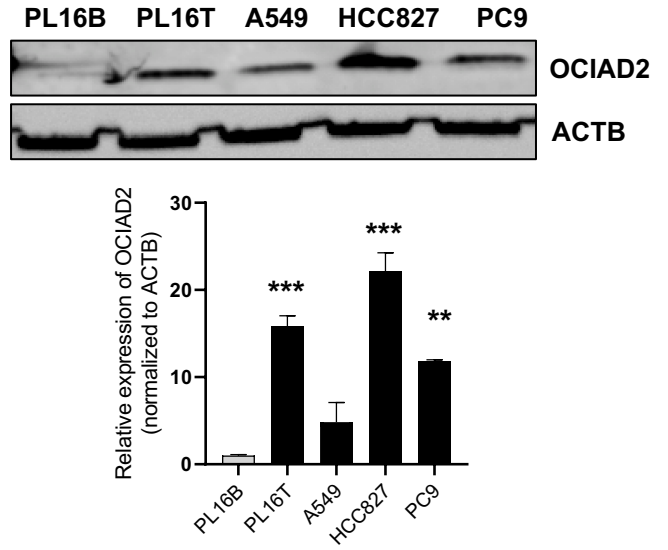

**C**

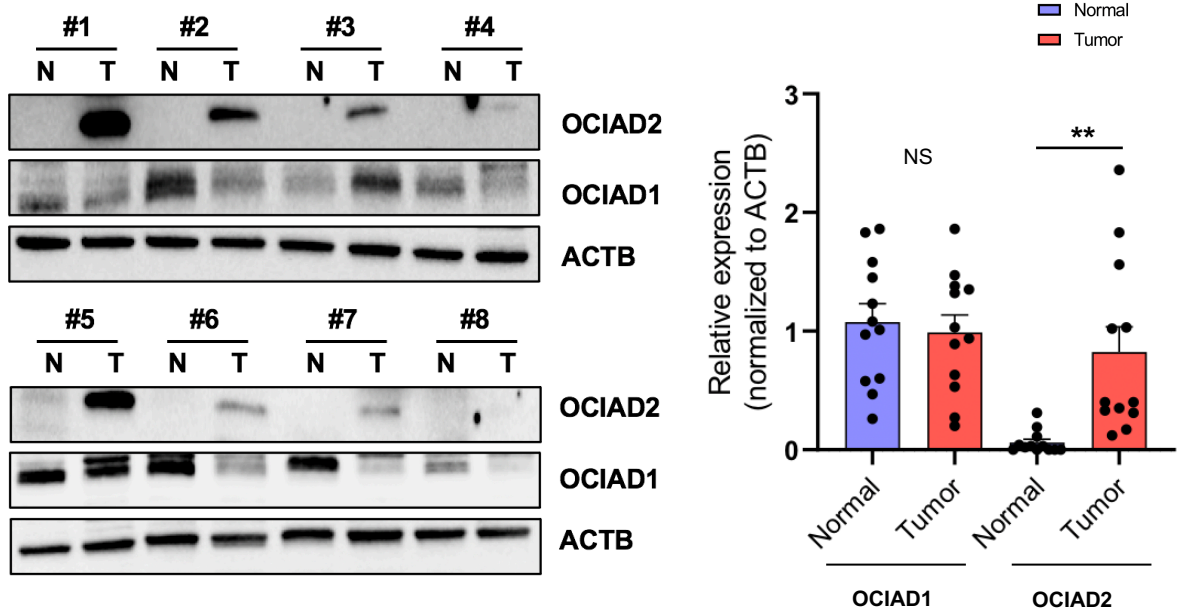

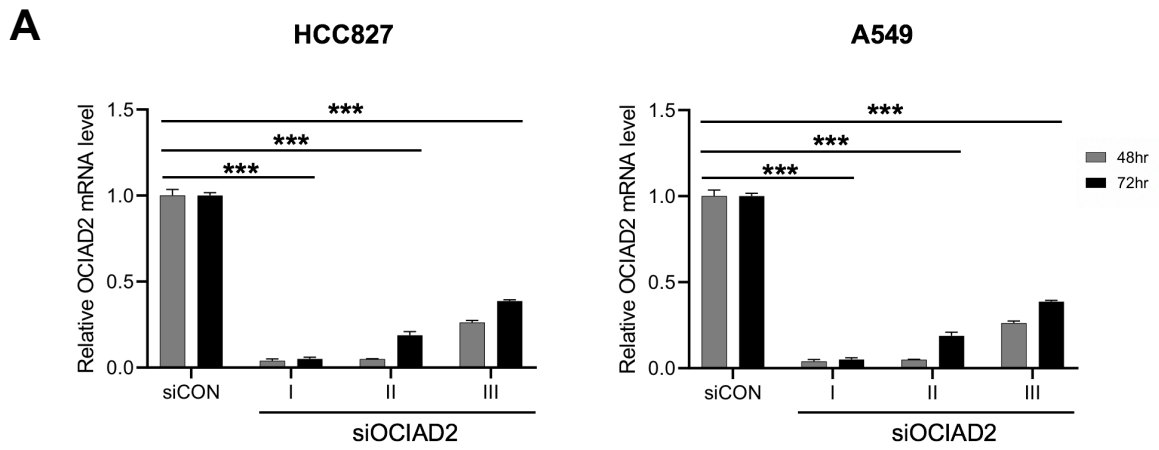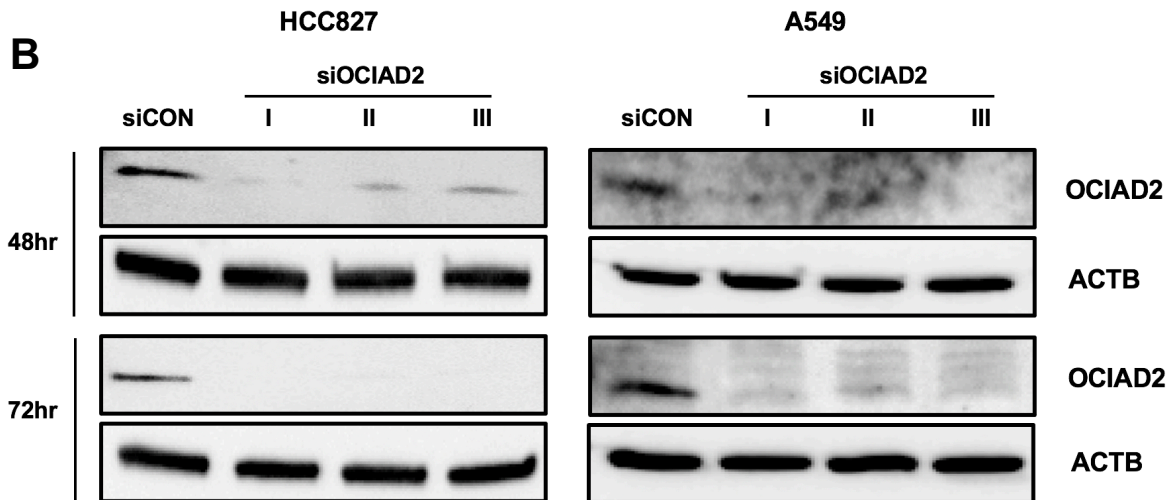

**A**

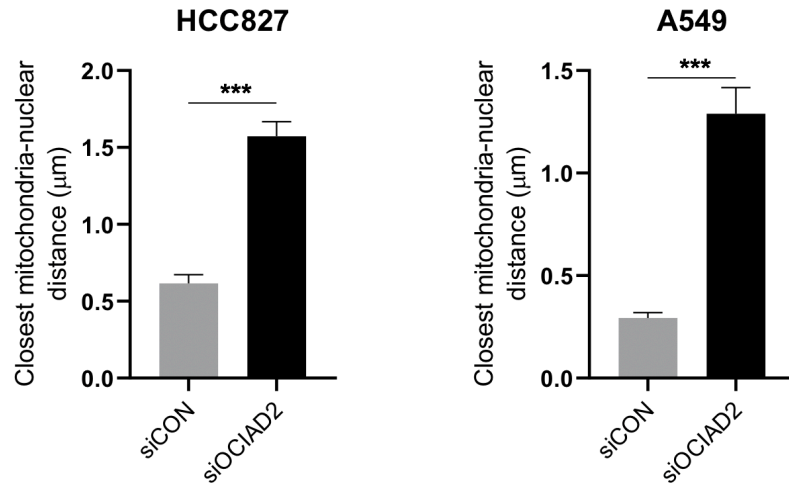

**B**

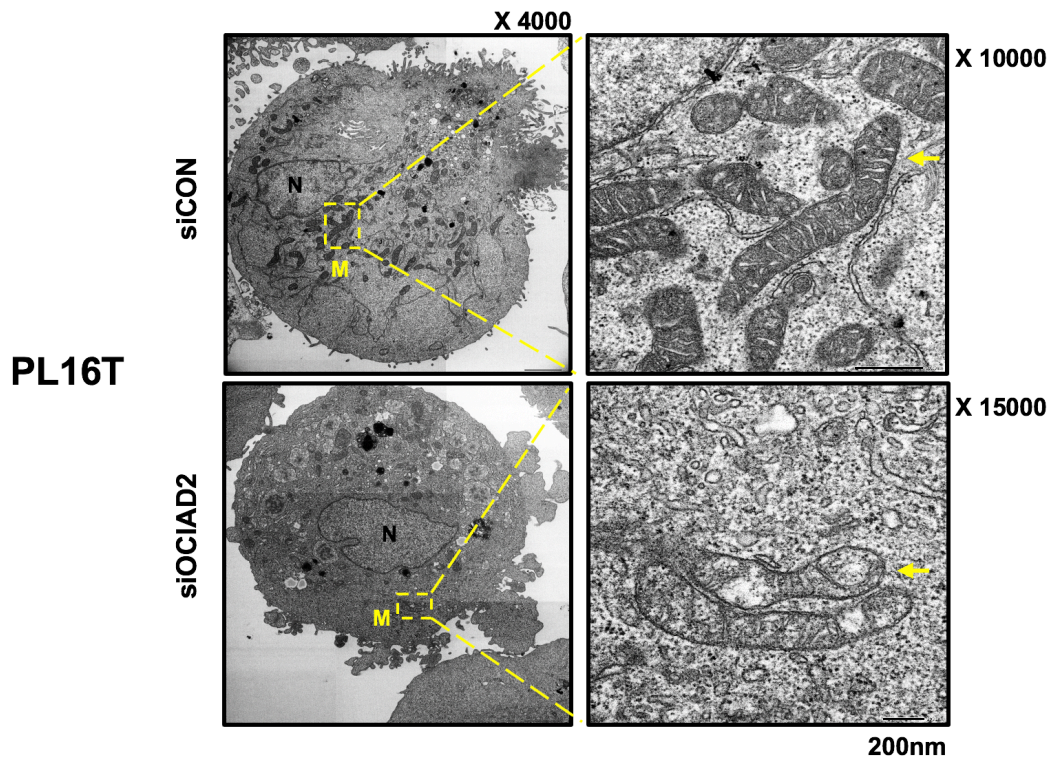

A549

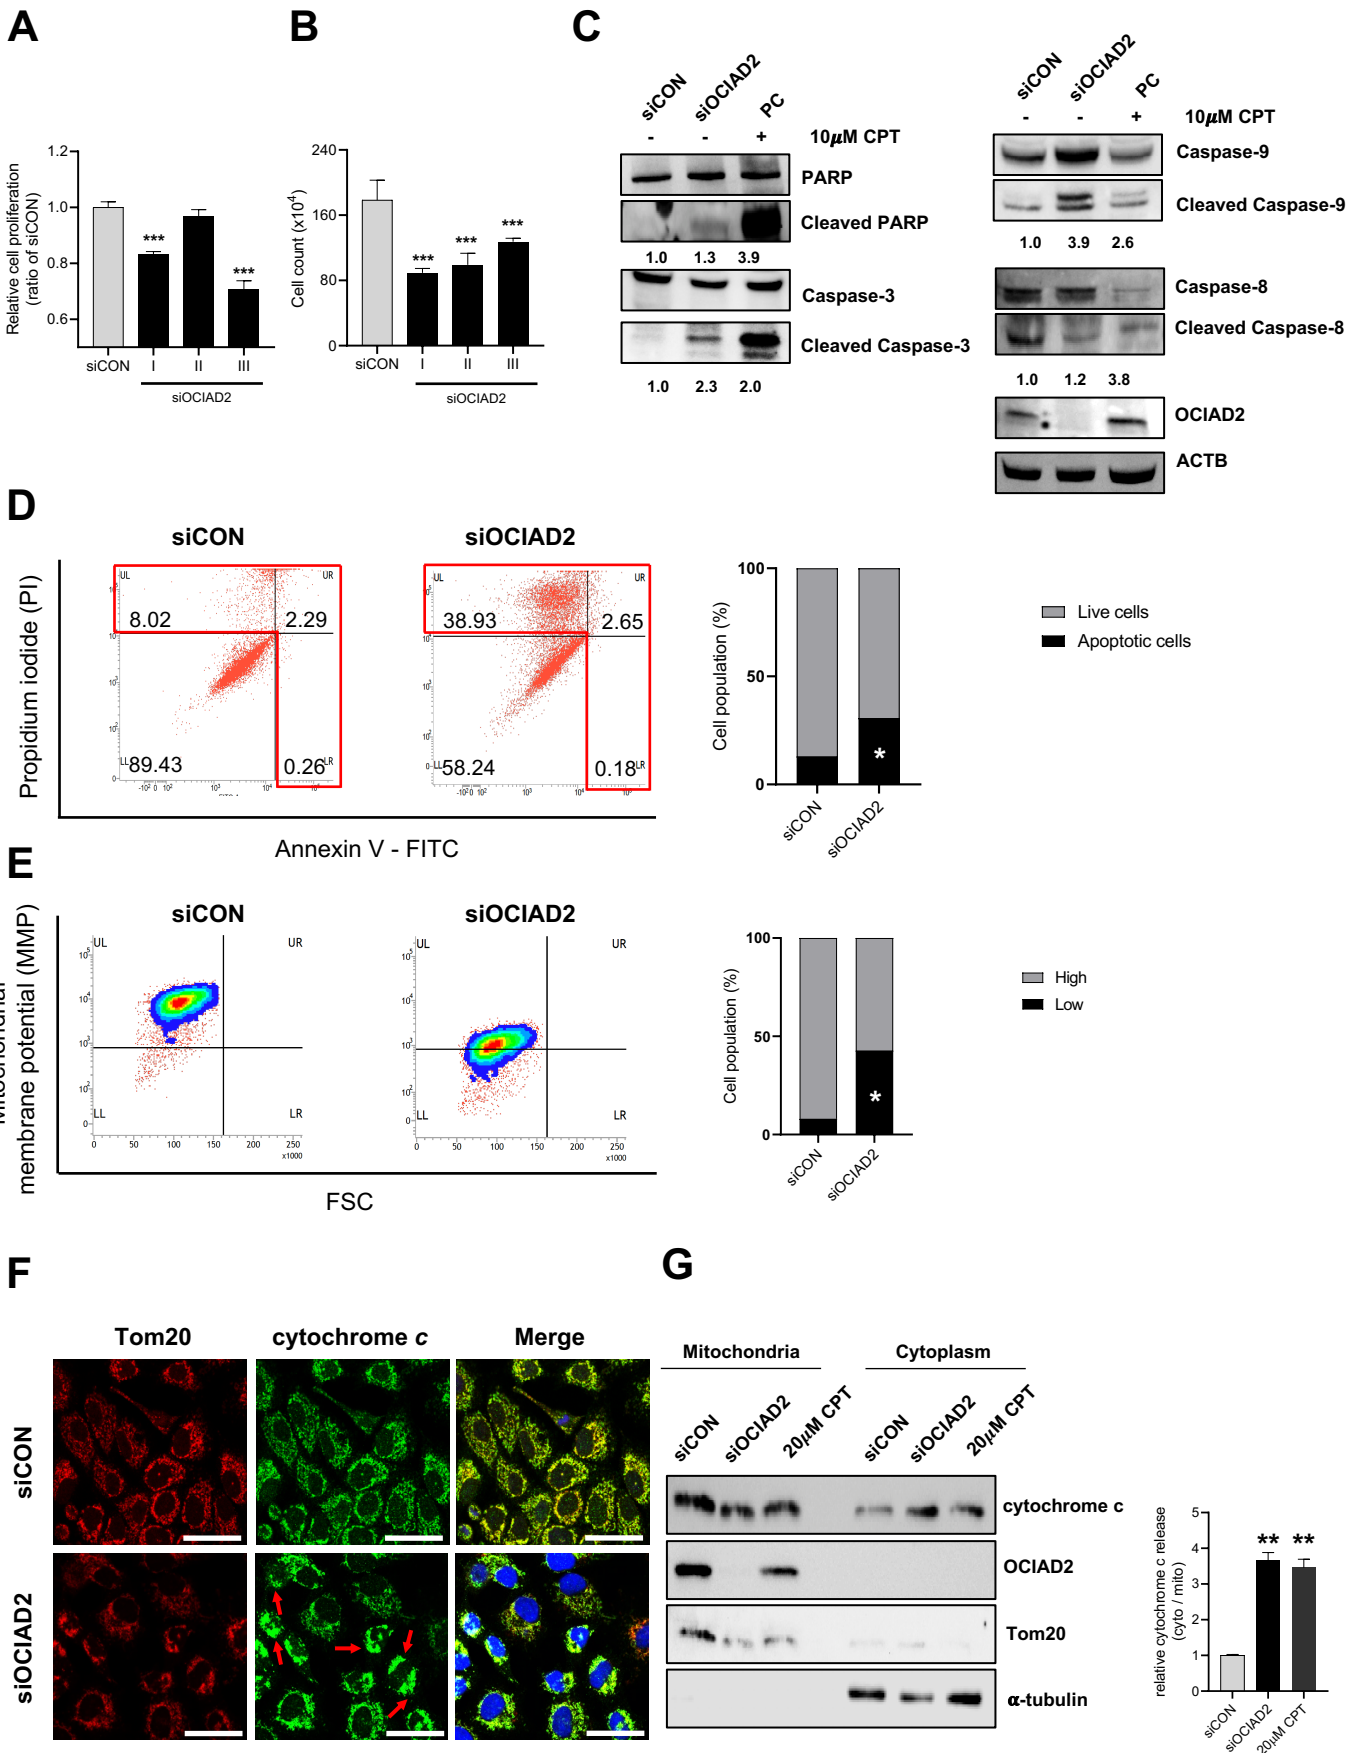

HCC827

A549

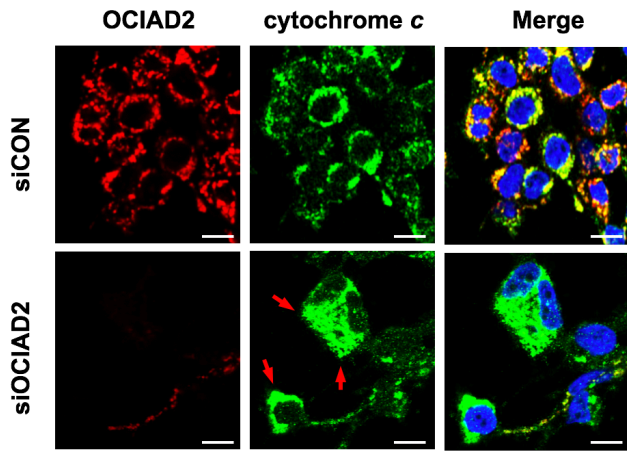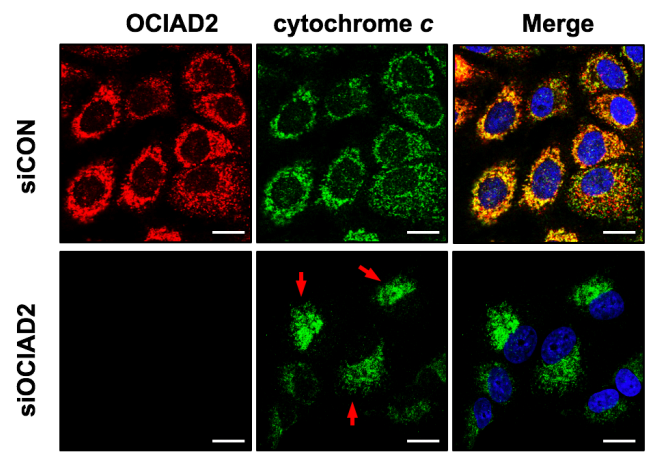

**A**

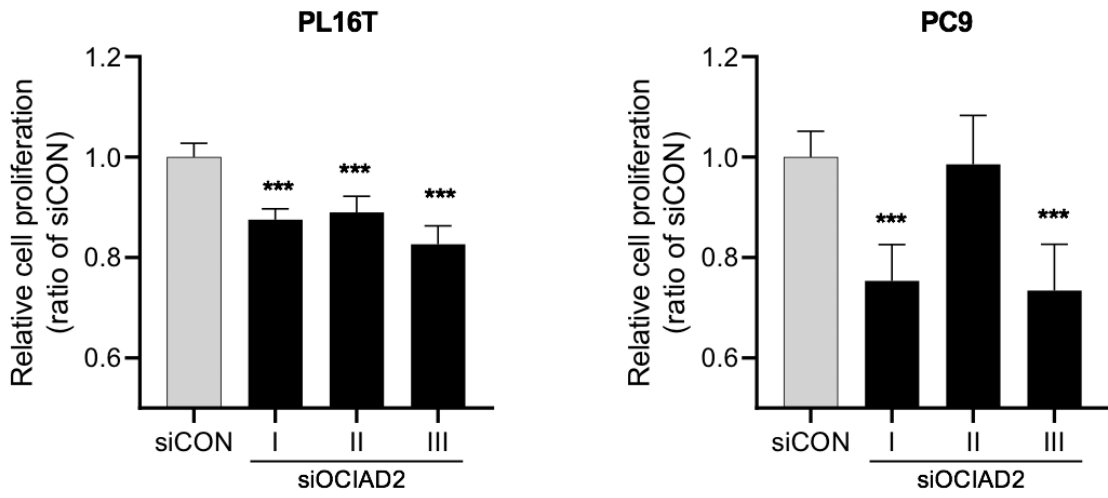

**B**

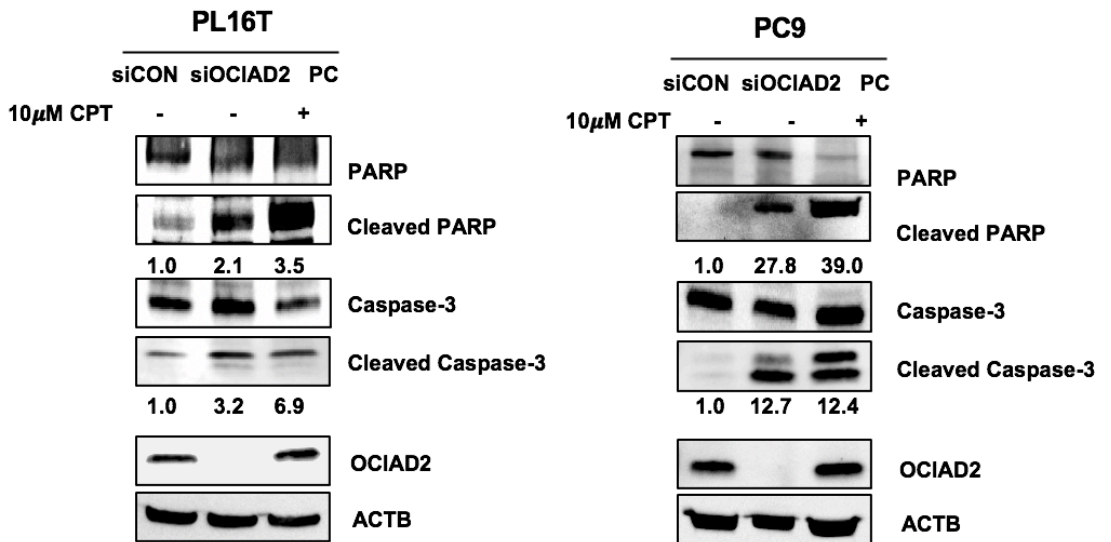

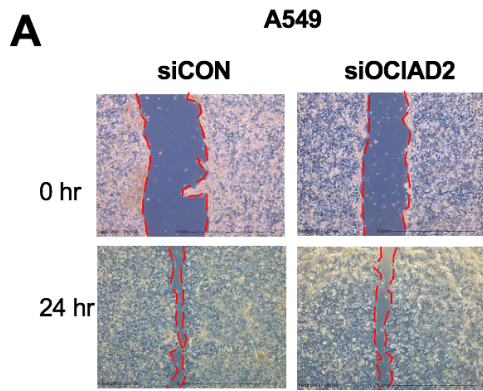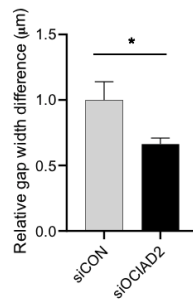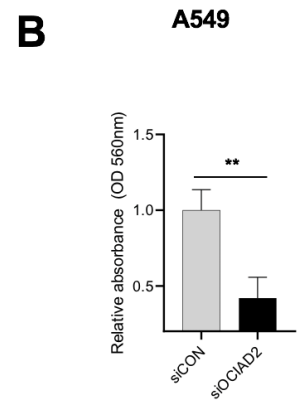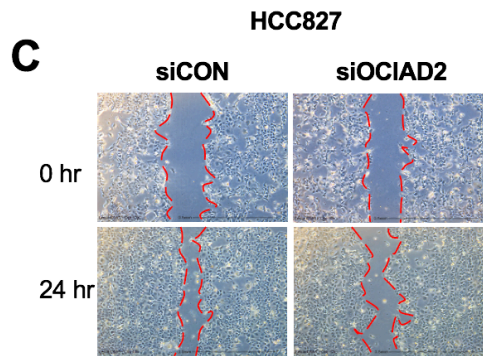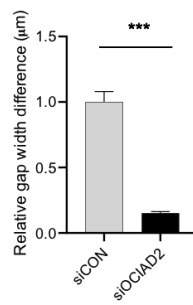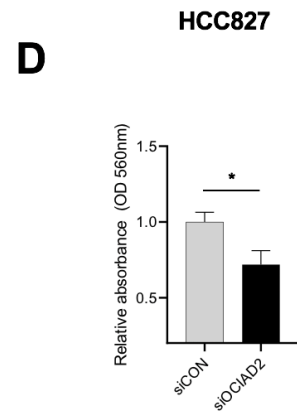

A

| Up-regulation           |               |                |                |                |
|-------------------------|---------------|----------------|----------------|----------------|
| Pathway                 | Genes         | A549           | HCC827         | PC9            |
| Pro-apoptotic initiator | BCL2L11 (Bim) | Up-regulated   | Up-regulated   |                |
|                         | BBC3 (PUMA)   | Up-regulated   |                | Up-regulated   |
|                         | BMF           | Up-regulated   | Up-regulated   | Up-regulated   |
| Cell cycle              | CDKN1A        | Up-regulated   |                | Up-regulated   |
|                         | BTG2          | Up-regulated   |                | Up-regulated   |
| ER stress               | KDEL3         | Up-regulated   | Up-regulated   |                |
|                         | HERPUD1       | Up-regulated   | Up-regulated   |                |
|                         | ATF3          | Up-regulated   |                | Up-regulated   |
| TP53                    | TP53INP1      | Up-regulated   | Up-regulated   | Up-regulated   |
| Down-regulation         |               |                |                |                |
| Pathway                 | Genes         | A549           | HCC827         | PC9            |
| NOTCH                   | NOTCH2        | Down-regulated |                | Down-regulated |
|                         | NOTCH3        | Down-regulated | Down-regulated | Down-regulated |
| DNA damage              | HIST1H2BN     | Down-regulated |                | Down-regulated |
|                         | HIST2H4B      | Down-regulated | Down-regulated | Down-regulated |
| PI3K/AKT signaling      | AKT3          | Down-regulated |                | Down-regulated |
|                         | MDM2          |                | Down-regulated | Down-regulated |

B

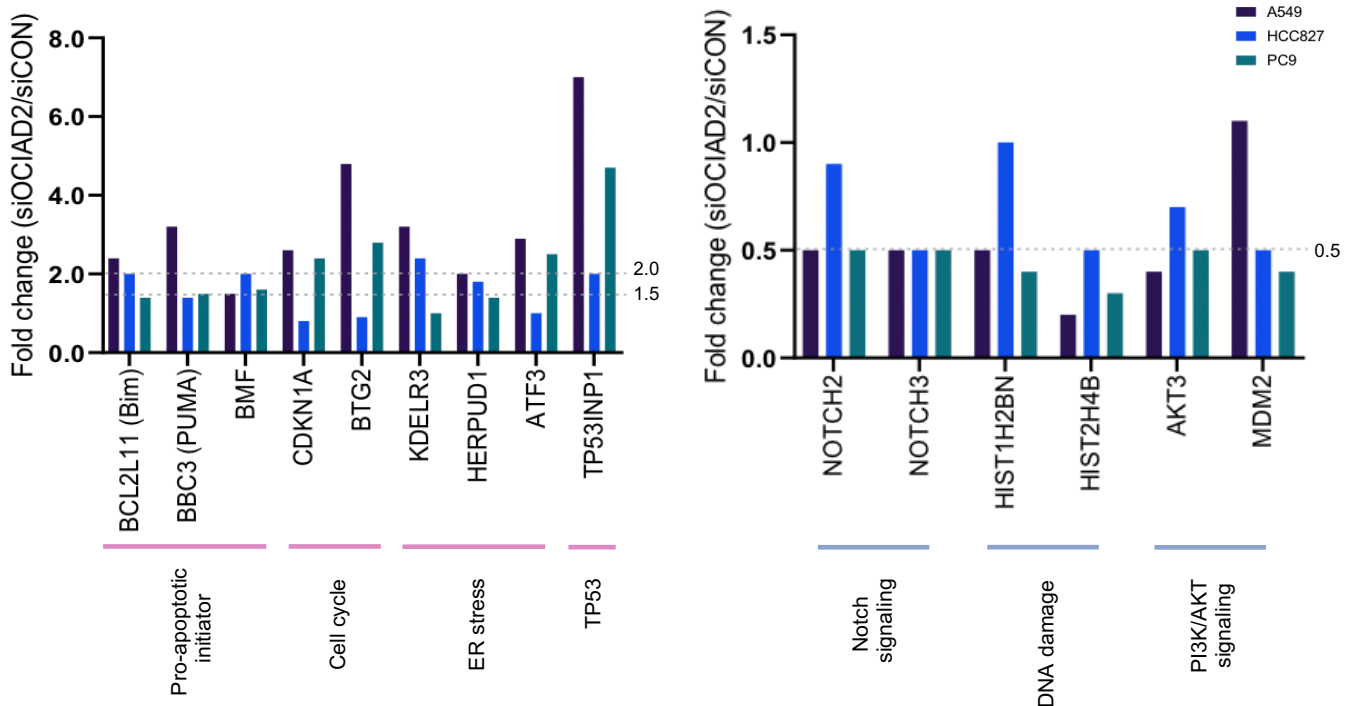



**A**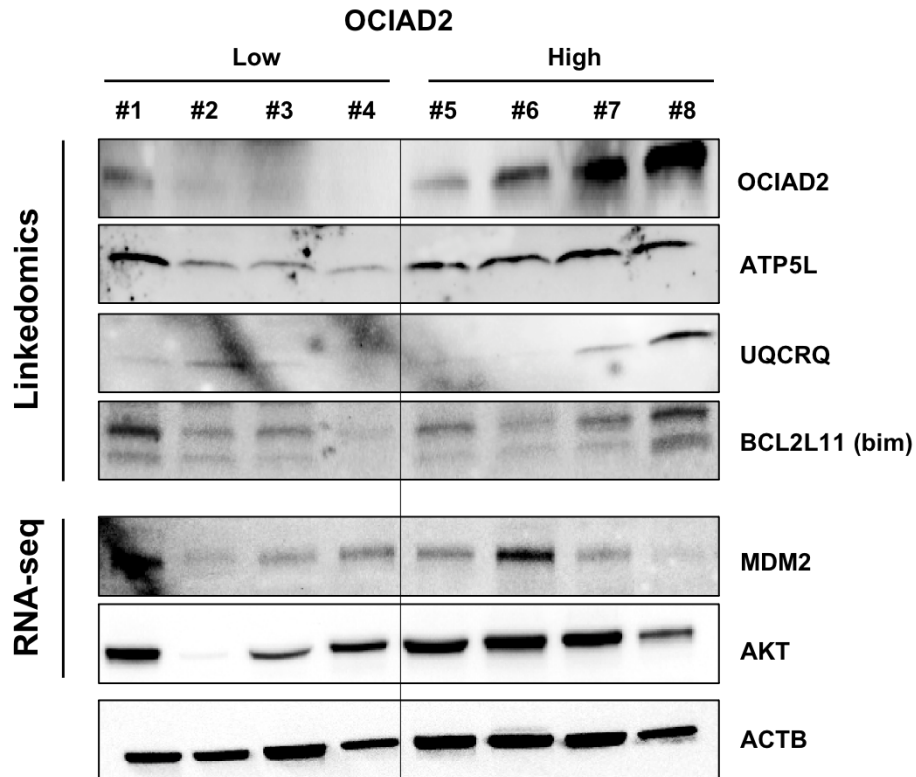**B**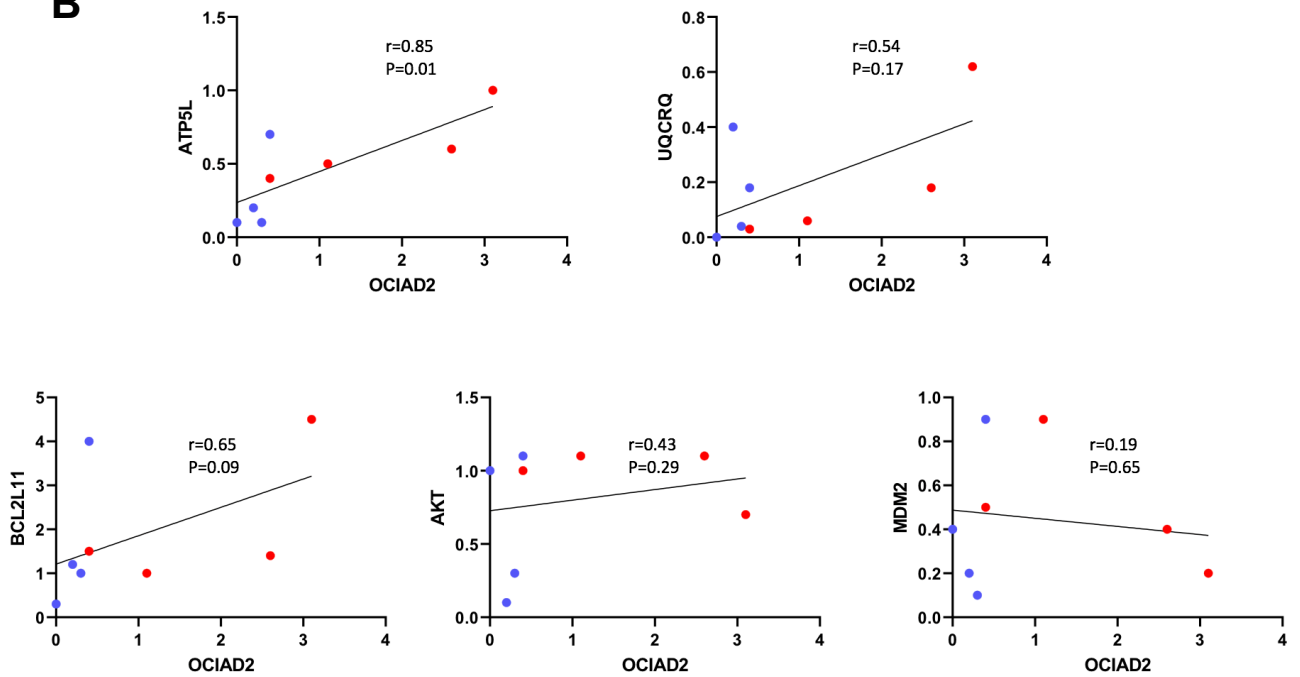

Supplement: CAS-112-5114-s002.pdf [file CAS-112-5114-s002.pdf]
